# Supplementary material for: The Interaction Between Allelic Variants of CD86 and CD40LG: A Common Risk Factor of Allergic Asthma and Rheumatoid Arthritis
Source: PubMed Central journal article supplement — Allergy Asthma Immunol Res. 2013 Oct 23;6(2):137–41. doi: 10.4168/aair.2014.6.2.137 (PMC3936042; doi:10.4168/aair.2014.6.2.137), 2013-10-23
Supplement: aair-6-137-s001.pdf [file aair-6-137-s001.pdf]

**Table S1.** Functional and clinical relevance of the SNPs examined in the present study and appropriate references

| Gene                      | SNP        | rs number | Minor allele frequency | Clinical relevancy   | Functional relevancy |
|---------------------------|------------|-----------|------------------------|----------------------|----------------------|
| <i>CTLA4</i> <sup>†</sup> | -318C>T    | rs5742909 | 12.9%                  | Yes <sup>1,2</sup>   | Yes <sup>3</sup>     |
|                           | +49A>G     | rs231775  | 31.8%                  | Yes <sup>2,4</sup>   | Yes <sup>5</sup>     |
|                           | 6230G>A    | rs3087243 | 17.8%                  | Yes <sup>6</sup>     | Yes <sup>7</sup>     |
| <i>CD28</i>               | IVS3+17T>C | rs3116496 | 7.5%                   | Yes <sup>8</sup>     | No                   |
| <i>CD86</i>               | -3479T>G   | rs2715267 | 24.6%                  | Yes <sup>9</sup>     | Yes <sup>9</sup>     |
|                           | 1179V      | rs2681417 | 0.3%                   | Yes <sup>10</sup>    | Yes <sup>10</sup>    |
| <i>CD40</i>               | -1C>T      | rs1883832 | 30.8%                  | Yes <sup>11,12</sup> | Yes <sup>11</sup>    |
| <i>CD40L</i>              | -3458A>G   | rs3092952 | 6.0%                   | Yes <sup>13</sup>    | Yes <sup>13</sup>    |

<sup>†</sup>*CTLA4*: gene coding cytotoxic T-lymphocyte-antigen 4

## REFERENCES

- Hizawa N, Yamaguchi E, Jinushi E, Konno S, Kawakami Y, Nishimura M. Increased total serum IgE levels in patients with asthma and promoter polymorphisms at CTLA4 and FCER1B. *J Allergy Clin Immunol* 2001;108:74-9.
- Chang MC, Chang YT, Tien YW, Liang PC, Jan IS, Wei SC, Wong JM. T-cell regulatory gene CTLA-4 polymorphism/haplotype association with autoimmune pancreatitis. *Clin Chem* 2007;53:1700-5.
- Wang XB, Zhao X, Giscombe R, Lefvert AK. A CTLA-4 gene polymorphism at position -318 in the promoter region affects the expression of protein. *Genes Immun* 2002;3:233-4.
- Sohn MH, Kim SH, Song TW, Kim KW, Kim ES, Park HS, Kim KE. Cytotoxic T lymphocyte-associated antigen-4 gene polymorphisms confer susceptibility to atopic asthma in Korean children. *Pediatr Pulmonol* 2007;42:542-7.
- Mäurer M, Loserth S, Kolb-Mäurer A, Ponath A, Wiese S, Kruse N, Rieckmann P. A polymorphism in the human cytotoxic T-lymphocyte antigen 4 (CTLA4) gene (exon 1 +49) alters T-cell activation. *Immunogenetics* 2002;54:1-8.
- Ban Y, Tozaki T, Taniyama M, Tomita M, Ban Y. Association of a CTLA-4 3' untranslated region (CT60) single nucleotide polymorphism with autoimmune thyroid disease in the Japanese population. *Autoimmunity* 2005;38:151-3.
- Ueda H, Howson JM, Esposito L, Heward J, Snook H, Chamberlain G, Rainbow DB, Hunter KM, Smith AN, Di Genova G, Herr MH, Dahlman I, Payne F, Smyth D, Lowe C, Twells RC, Howlett S, Healy B, Nutland S, Rance HE, Everett V, Smink LJ, Lam AC, Cordell HJ, Walker NM, Bordin C, Hulme J, Motzo C, Cucca F, Hess JF, Metzker ML, Rogers J, Gregory S, Allahabadi A, Nithiyanthan R, Tuomilehto-Wolf E, Tuomilehto J, Bingley P, Gillespie KM, Undlien DE, Rønningen KS, Guja C, Ionescu-Tîrgoviște C, Savage DA, Maxwell AP, Carson DJ, Patterson CC, Franklyn JA, Clayton DG, Peterson LB, Wicker LS, Todd JA, Gough SC. Association of the T-cell regulatory gene CTLA4 with susceptibility to autoimmune disease. *Nature* 2003;423:506-11.
- Gunesacar R, Erken E, Bozkurt B, Ozer HT, Dinkci S, Erken EG, Oz-balkan Z. Analysis of CD28 and CTLA-4 gene polymorphisms in Turkish patients with Behcet's disease. *Int J Immunogenet* 2007; 34:45-9.
- Abdallah AM, Renzoni EA, Anevclavis S, Lagan AL, Munkonge FM, Fonseca C, Black CM, Briggs D, Wells AU, Marshall SE, McHugh N, du Bois RM, Welsh KI. A polymorphism in the promoter region of the CD86 (B7.2) gene is associated with systemic sclerosis. *Int J Immunogenet* 2006;33:155-61.
- Corydon TJ, Haagerup A, Jensen TG, Binderup HG, Petersen MS, Kalsoft K, Vestbo J, Kruse TA, Børglum AD. A functional CD86 polymorphism associated with asthma and related allergic disorders. *J Med Genet* 2007;44:509-15.
- Park JH, Chang HS, Park CS, Jang AS, Park BL, Rhim TY, Uh ST, Kim YH, Chung IY, Shin HD. Association analysis of CD40 polymorphisms with asthma and the level of serum total IgE. *Am J Respir Crit Care Med* 2007;175:775-82.
- Mukai T, Hiromatsu Y, Fukutani T, Ichimura M, Kaku H, Miyake I, Yamada K. A C/T polymorphism in the 5' untranslated region of the CD40 gene is associated with later onset of Graves' disease in Japanese. *Endocr J* 2005;52:471-7.
- Mälärstig A, Lindahl B, Wallentin L, Siegbahn A. Soluble CD40L levels are regulated by the -3459 A>G polymorphism and predict myocardial infarction and the efficacy of antithrombotic treatment in non-ST elevation acute coronary syndrome. *Arterioscler Thromb Vasc Biol* 2006;26:1667-73.
