# Supplementary material for: The Interaction Between Allelic Variants of CD86 and CD40LG: A Common Risk Factor of Allergic Asthma and Rheumatoid Arthritis
Source: PubMed Central journal article supplement — Allergy Asthma Immunol Res. 2013 Oct 23;6(2):137–41. doi: 10.4168/aair.2014.6.2.137 (PMC3936042; doi:10.4168/aair.2014.6.2.137), 2013-10-23
Supplement: aair-6-137-s002.pdf [file aair-6-137-s002.pdf]

**Table S2.** Summary of MDR findings for RA

| No. of factor | Combination                                                                                                                                  | CV* consistency | Prediction error (%) | Pvalue |
|---------------|----------------------------------------------------------------------------------------------------------------------------------------------|-----------------|----------------------|--------|
| 2             | -3479T>G ( <i>CD86</i> ),<br>-3458A>G ( <i>CD40LG</i> )                                                                                      | 9/10            | 33.4                 | 0.019  |
| 3             | -3479T>G ( <i>CD86</i> ),<br>-3458A>G ( <i>CD40LG</i> ),<br>+49A>G ( <i>CTLA4</i> )                                                          | 6/10            | 43.1                 | 0.451  |
| 4             | -3479T>G ( <i>CD86</i> ),<br>-3458A>G ( <i>CD40LG</i> ),<br>+49A>G ( <i>CTLA4</i> )<br>-1C>T ( <i>CD40</i> )                                 | 6/10            | 44.6                 | 0.541  |
| 5             | -3479T>G ( <i>CD86</i> ),<br>-3458A>G ( <i>CD40LG</i> ),<br>+49A>G ( <i>CTLA4</i> ),<br>-1C>T ( <i>CD40</i> ),<br>IVS3+17T>C ( <i>CD28</i> ) | 3/10            | 49.4                 | 0.946  |

\*Cross validation.
